# Supplementary material for: Assessment of Clinician Diagnostic Concordance With Video Telemedicine in the Integrated Multispecialty Practice at Mayo Clinic During the Beginning of COVID-19 Pandemic From March to June 2020
Source: PubMed Central journal article supplement (PMC9440401; doi:10.1001/jamanetworkopen.2022.29958), 2022-09-02
Supplement: jamanetwopen-e2229958-s001.pdf [file jamanetwopen-e2229958-s001.pdf]

## Supplemental Online Content

Demaerschalk BM, Pines A, Butterfield R, et al; Diagnostic Accuracy of Telemedicine Utilized at Mayo Clinic Alix School of Medicine Study Group Investigators. Assessment of clinician diagnostic concordance with video telemedicine in the integrated multispecialty practice at Mayo Clinic during the beginning of COVID-19 pandemic from March to June 2020. *JAMA Netw Open.* 2022;5(9):e2229958. doi:10.1001/jamanetworkopen.2022.29958

**eFigure.** Geographic Residence of Patients at Telemedicine Visit

**eTable 1.** Logistic Regression Model Results

**eTable 2.** Concordance Estimates by Clinical Area

**eTable 3.** Concordance Estimates by *ICD* Chapter

**eTable 4.** Concordance by *ICD* Code (>10 Cases)

This supplemental material has been provided by the authors to give readers additional information about their work.

**eFigure. Geographic Residence of Patients at Telemedicine Visit**

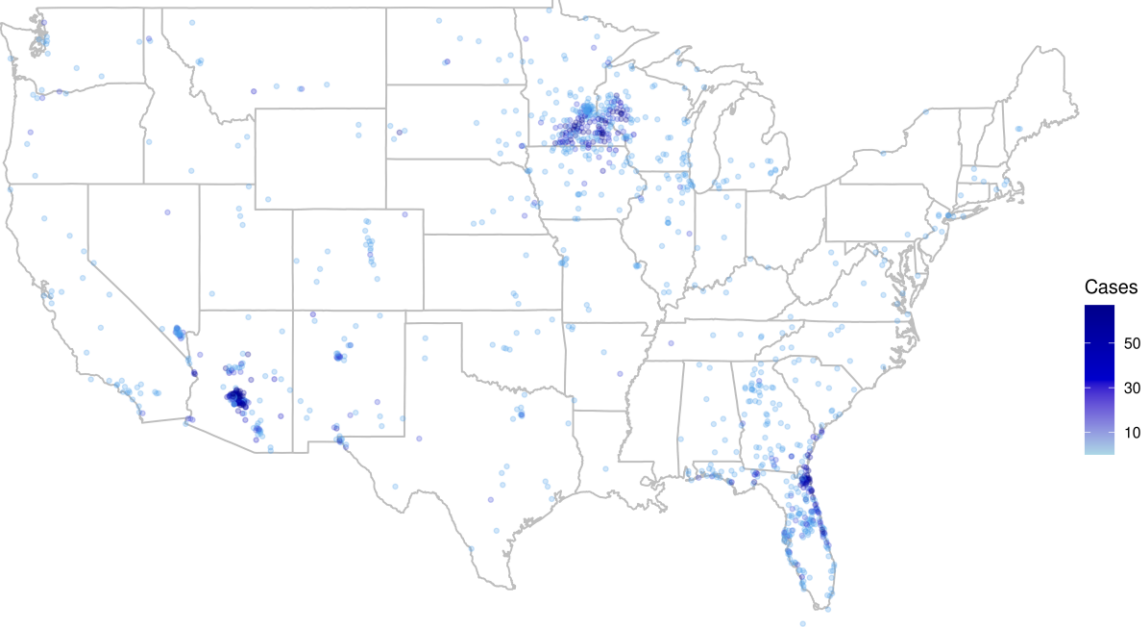

| <b>eTable 1. Logistic Regression Model Results</b> |                                                 |                             |                             |
|----------------------------------------------------|-------------------------------------------------|-----------------------------|-----------------------------|
| <b>Variable</b>                                    | <b>Level</b>                                    | <b>Univariate Model</b>     | <b>Multivariable Model</b>  |
|                                                    |                                                 | <b>OR (95% CI), p value</b> | <b>OR (95% CI), p value</b> |
| Age                                                | Every Ten Unit Increase                         | 0.93 (0.87, 1.00), 0.04     | 0.91 (0.85, 0.97), 0.007    |
| Gender                                             | Male vs. Female                                 | 0.95 (0.74, 1.22), 0.69     |                             |
| Site                                               | MCHS vs. Arizona                                | 1.38 (0.96, 1.98), 0.09     |                             |
|                                                    | Rochester vs. Arizona                           | 1.24 (0.85, 1.81), 0.26     |                             |
|                                                    | Florida vs. Arizona                             | 1.03 (0.72, 1.46), 0.88     |                             |
| Clinician Type                                     | Non-Physician vs. Physician                     | 0.99 (0.70, 1.39), 0.95     |                             |
| Case Type                                          | Surgical vs. Non-Surgical                       | 1.38 (1.02, 1.87), 0.04     | 1.22 (0.87, 1.71), 0.24     |
| Demographic                                        | Pediatric vs. Adult                             | 0.52 (0.22, 1.21), 0.13     |                             |
| Specialty                                          | Specialist vs. Primary Care                     | 1.68 (1.27, 2.21), <.001    | 1.69 (1.24, 2.30), <.001    |
| Duration                                           | Every Ten Unit Increase                         | 1.02 (0.94, 1.10), 0.65     |                             |
| Clinician Years Certified                          | Every Ten Unit Increase                         | 0.91 (0.78, 1.05), 0.19     |                             |
| Prior Telemedicine Experience                      | Yes vs. No                                      | 0.99 (0.68, 1.44), 0.96     |                             |
| Clinician Years Certified Categories               | Certified years 14 - <23 years vs. 0 - <7 years | 1.20 (0.79, 1.83), 0.40     |                             |
|                                                    | Certified years 7 - <14 years vs. 0 - <7 years  | 1.13 (0.75, 1.71), 0.55     |                             |
|                                                    | Certified years >= 23 years vs. 0 - <7 years    | 0.87 (0.58, 1.29), 0.49     |                             |

**eTable 2. Concordance Estimates by Clinical Area**

| Level                                          | No. Concordant /<br>No. Cases | Concordance Percent<br>(Wald 95% CI) |
|------------------------------------------------|-------------------------------|--------------------------------------|
| Allergy and Immunology                         | 32/33                         | 97.0 (91.1, 100.0)                   |
| Breast Clinic                                  | 10/11                         | 90.9 (73.9, 100.0)                   |
| Cardiovascular Disease                         | 90/105                        | 85.7 (79.0, 92.4)                    |
| Cardiovascular Surgery                         | 6/6                           | 100                                  |
| Child and Adolescent Neurology                 | 6/6                           | 100                                  |
| Clinical Genomics                              | 2/2                           | 100                                  |
| Colon and Rectal Surgery                       | 15/16                         | 93.8 (81.9, 100.0)                   |
| Community Internal Medicine                    | 76/96                         | 79.2 (71.0, 87.3)                    |
| Community Pediatric and Adolescent<br>Medicine | 7/10                          | 70                                   |
| Dermatology                                    | 46/58                         | 79.3 (68.9, 89.7)                    |
| Endocrinology                                  | 10/12                         | 83.3 (62.2, 100.0)                   |
| Express or Urgent Care                         | 1/2                           | 50                                   |
| Family Medicine                                | 245/293                       | 83.6 (79.4, 87.9)                    |
| Gastroenterology and Hepatology                | 192/239                       | 80.3 (75.3, 85.4)                    |
| General Internal Medicine                      | 50/63                         | 79.4 (69.4, 89.4)                    |
| General Pediatric and Adolescent Medicine      | 3/7                           | 42.9                                 |
| General Surgery                                | 18/19                         | 94.7 (84.7, 100.0)                   |
| Hematology Oncology                            | 65/65                         | 100.0 (100.0, 100.0)                 |
| Hepatobiliary and Pancreas Surgery             | 4/4                           | 100                                  |
| Infectious Diseases                            | 5/5                           | 100                                  |
| Integrative Medicine                           | 3/3                           | 100                                  |
| Nephrology and Hypertension                    | 5/5                           | 100                                  |
| Neurological Surgery                           | 80/87                         | 92.0 (86.2, 97.7)                    |
| Neurology                                      | 114/141                       | 80.9 (74.4, 87.3)                    |
| Nutritional Medicine                           | 10/10                         | 100                                  |
| Obstetrics and Gynecology                      | 102/117                       | 87.2 (81.1, 93.2)                    |
| Occupational Medicine                          | 11/12                         | 91.7 (76.0, 100.0)                   |
| Oncology and Endocrine Surgery                 | 7/7                           | 100                                  |
| Ophthalmology                                  | 11/12                         | 91.7 (76.0, 100.0)                   |
| Orthopedic Surgery                             | 136/149                       | 91.3 (86.7, 95.8)                    |
| Otorhinolaryngology                            | 34/44                         | 77.3 (64.9, 89.7)                    |
| Pain Medicine                                  | 7/7                           | 100                                  |
| Pediatric Allergy and Immunology               | 1/1                           | 100                                  |
| Pediatric Cardiology                           | 7/7                           | 100                                  |
| Pediatric Gastroenterology                     | 1/1                           | 100                                  |
| Pediatric Sleep Medicine                       | 3/3                           | 100                                  |
| Pediatric Urology                              | 1/1                           | 100                                  |

**eTable 2 (Continued). Concordance Estimates by Clinical Area**

| <b>Level</b>                         | <b>No. Concordant /<br/>No. Cases</b> | <b>Concordance Percent<br/>(Wald 95% CI)</b> |
|--------------------------------------|---------------------------------------|----------------------------------------------|
| Physical Medicine and Rehabilitation | 41/48                                 | 85.4 (75.4, 95.4)                            |
| Plastic Surgery                      | 9/10                                  | 90                                           |
| Preventive Medicine                  | 3/4                                   | 75                                           |
| Psychiatry and Psychology            | 95/99                                 | 96.0 (92.1, 99.8)                            |
| Pulmonary Medicine                   | 64/74                                 | 86.5 (78.7, 94.3)                            |
| Radiation Oncology                   | 67/67                                 | 100.0 (100.0, 100.0)                         |
| Radiology                            | 1/1                                   | 100                                          |
| Rheumatology                         | 6/9                                   | 66.7                                         |
| Sleep Medicine                       | 24/28                                 | 85.7 (72.8, 98.7)                            |
| Spine                                | 13/20                                 | 65.0 (44.1, 85.9)                            |
| Sports Medicine                      | 5/5                                   | 100                                          |
| Thoracic Surgery                     | 15/15                                 | 100.0 (100.0, 100.0)                         |
| Transplant                           | 105/109                               | 96.3 (92.8, 99.9)                            |
| Urology                              | 186/209                               | 89.0 (84.8, 93.2)                            |
| Vascular Surgery                     | 7/8                                   | 87.5                                         |
| Women's Health                       | 23/27                                 | 85.2 (71.8, 98.6)                            |

**eTable 3. Concordance Estimates by ICD Chapter**

| Level                                           | No. Concordant /<br>No. Cases | Concordance Percent<br>(Wald 95% CI) |
|-------------------------------------------------|-------------------------------|--------------------------------------|
| A00-B99: Infectious and Parasitic Diseases      | 7/8                           | 87.5                                 |
| C00-D49: Neoplasms                              | 269/278                       | 96.8 (94.7, 98.8)                    |
| COVID-19                                        | 4/4                           | 100                                  |
| D50-D89: Blood and Immune Mechanisms            | 21/24                         | 87.5 (74.3, 100.0)                   |
| E00-E89: Endocrine, Nutritional and Metabolic   | 73/81                         | 90.1 (83.6, 96.6)                    |
| F01-F99: Mental, Behavior, and Neurodevelopment | 163/172                       | 94.8 (91.4, 98.1)                    |
| G00-G99: Nervous System                         | 144/164                       | 87.8 (82.8, 92.8)                    |
| H00-H59: Eye and Adnexa                         | 12/14                         | 85.7 (67.4, 100.0)                   |
| H60-H95: Ear and Mastoid                        | 11/17                         | 64.7 (42.0, 87.4)                    |
| I00-I99: Circulatory System                     | 104/113                       | 92.0 (87.0, 97.0)                    |
| J00-J99: Respiratory System                     | 77/90                         | 85.6 (78.3, 92.8)                    |
| K00-K95: Digestive System                       | 154/177                       | 87.0 (82.1, 92.0)                    |
| L00-L99: Skin and Subcutaneous Tissue           | 48/63                         | 76.2 (65.7, 86.7)                    |
| M00-M99: Musculoskeletal and Connective Tissue  | 257/300                       | 85.7 (81.7, 89.6)                    |
| N00-N99: Genitourinary System                   | 144/169                       | 85.2 (79.9, 90.6)                    |
| O00-O9A: Pregnancy, Childbirth and Puerperium   | 8/8                           | 100                                  |
| Q00-Q99: Congenital Abnormalities               | 22/24                         | 91.7 (80.6, 100.0)                   |
| R00-R99: Abnormal Clinical Laboratory Findings  | 303/402                       | 75.4 (71.2, 79.6)                    |
| S00-T88: Injury and External Causes             | 45/49                         | 91.8 (84.2, 99.5)                    |
| Z00-Z99: Health Status                          | 208/228                       | 91.2 (87.6, 94.9)                    |

**eTable 4. Concordance by ICD Code (>10 Cases)**

| ICD Code | ICD Term                                                                  | No. Concordant /<br>No. Cases | Concordance Percent<br>(Wald 95% CI) |
|----------|---------------------------------------------------------------------------|-------------------------------|--------------------------------------|
| C61      | Malignant neoplasm of prostate                                            | 56/59                         | 94.9 (89.3, 100.0)                   |
| Z00.00   | Encounter for general adult medical examination without abnormal findings | 21/30                         | 70.0 (53.6, 86.4)                    |
| F41.1    | Generalized anxiety disorder                                              | 28/29                         | 96.6 (89.9, 100.0)                   |
| Z01.818  | Encounter for other preprocedural examination                             | 23/25                         | 92.0 (81.4, 100.0)                   |
| M54.5    | Low back pain                                                             | 17/22                         | 77.3 (59.8, 94.8)                    |
| G47.33   | Obstructive sleep apnea                                                   | 16/17                         | 94.1 (82.9, 100.0)                   |
| I10      | Essential (primary) hypertension                                          | 17/17                         | 100.0 (100.0, 100.0)                 |
| K21.9    | Gastro-esophageal reflux disease without esophagitis                      | 15/17                         | 88.2 (72.9, 100.0)                   |
| R97.20   | Elevated prostate specific antigen [PSA]                                  | 15/17                         | 88.2 (72.9, 100.0)                   |
| F33.1    | Major depressive disorder, recurrent, moderate                            | 15/15                         | 100.0 (100.0, 100.0)                 |
| N40.1    | Benign prostatic hyperplasia with lower urinary tract symptoms            | 12/13                         | 92.3 (77.8, 100.0)                   |
| R05      | Cough                                                                     | 10/12                         | 83.3 (62.2, 100.0)                   |
| C67.9    | Malignant neoplasm of bladder, unspecified                                | 11/11                         | 100.0 (100.0, 100.0)                 |

**eTable 4 (Continued). Concordance by ICD Code (6-10 Cases)**

| ICD Code | ICD Term                                                                 | No. Concordant /<br>No. Cases | Concordance Percent |
|----------|--------------------------------------------------------------------------|-------------------------------|---------------------|
| F41.9    | Anxiety disorder, unspecified                                            | 8/10                          | 80                  |
| M25.511  | Pain in right shoulder                                                   | 6/10                          | 60                  |
| N18.6    | End stage renal disease                                                  | 10/10                         | 100                 |
| R13.10   | Dysphagia, unspecified                                                   | 9/10                          | 90                  |
| 272.4    | Other and unspecified hyperlipidemia                                     | 9/9                           | 100                 |
| C50.412  | Malignant neoplasm of upper-outer quadrant of left female breast         | 9/9                           | 100                 |
| F33.0    | Major depressive disorder, recurrent, mild                               | 8/9                           | 88.9                |
| G95.9    | Disease of spinal cord, unspecified                                      | 6/9                           | 66.7                |
| M47.816  | Spondylosis without myelopathy or radiculopathy, lumbar region           | 6/9                           | 66.7                |
| M48.062  | Spinal Stenosis Lumbar Region with Neurogenic Claudication               | 9/9                           | 100                 |
| C71.9    | Malignant neoplasm of brain, unspecified                                 | 8/8                           | 100                 |
| E66.01   | Morbid (severe) obesity due to excess calories                           | 7/8                           | 87.5                |
| E78.5    | Hyperlipidemia, unspecified                                              | 8/8                           | 100                 |
| K50.90   | Crohn's disease, unspecified, without complications                      | 8/8                           | 100                 |
| K51.90   | Ulcerative colitis, unspecified, without complications                   | 8/8                           | 100                 |
| M25.512  | Pain in left shoulder                                                    | 8/8                           | 100                 |
| M54.17   | Radiculopathy, lumbosacral region                                        | 8/8                           | 100                 |
| R06.02   | Shortness of breath                                                      | 7/8                           | 87.5                |
| R19.7    | Diarrhea, unspecified                                                    | 8/8                           | 100                 |
| R31.9    | Hematuria, unspecified                                                   | 6/8                           | 75                  |
| J30.9    | Allergic rhinitis, unspecified                                           | 7/7                           | 100                 |
| L70.0    | Acne vulgaris                                                            | 7/7                           | 100                 |
| M25.561  | Pain in right knee                                                       | 7/7                           | 100                 |
| N20.0    | Calculus of kidney                                                       | 7/7                           | 100                 |
| R56.9    | Unspecified convulsions                                                  | 6/7                           | 85.7                |
| Z00.129  | Encounter for routine child health examination without abnormal findings | 7/7                           | 100                 |
| Z00.5    | Encounter for examination of potential donor of organ and tissue         | 7/7                           | 100                 |
| C50.411  | Malignant neoplasm of upper-outer quadrant of right female breast        | 6/6                           | 100                 |
| E11.40   | Type 2 diabetes mellitus with diabetic neuropathy, unspecified           | 6/6                           | 100                 |
| G43.909  | Migraine, unspecified, not intractable, without status migrainosus       | 6/6                           | 100                 |
| G62.9    | Polyneuropathy, unspecified                                              | 3/6                           | 50                  |
| J84.9    | Interstitial pulmonary disease, unspecified                              | 6/6                           | 100                 |
| M25.50   | Pain in unspecified joint                                                | 5/6                           | 83.3                |
| M54.12   | Radiculopathy, cervical region                                           | 6/6                           | 100                 |
| M54.2    | Cervicalgia                                                              | 4/6                           | 66.7                |
| N28.89   | Other specified disorders of kidney and ureter                           | 5/6                           | 83.3                |
| N39.0    | Urinary tract infection, site not specified                              | 4/6                           | 66.7                |
| N80.9    | Endometriosis, unspecified                                               | 6/6                           | 100                 |
| R53.83   | Other fatigue                                                            | 3/6                           | 50                  |
