# Supplementary material for: Assessment of Clinician Diagnostic Concordance With Video Telemedicine in the Integrated Multispecialty Practice at Mayo Clinic During the Beginning of COVID-19 Pandemic From March to June 2020
Source: PubMed Central journal article supplement (PMC9440401; doi:10.1001/jamanetworkopen.2022.29958), 2022-09-02
Supplement: jamanetwopen-e2229958-s002.pdf [file jamanetwopen-e2229958-s002.pdf]

| <b>*Group Name(s): Diagnostic Accuracy of Telemedicine utilized at Mayo Clinic Alix School of Medicine Study Group Investigators</b> |                   |                              |                         |                                                                  |                                                 |                                                                |                                                                                                   |
|--------------------------------------------------------------------------------------------------------------------------------------|-------------------|------------------------------|-------------------------|------------------------------------------------------------------|-------------------------------------------------|----------------------------------------------------------------|---------------------------------------------------------------------------------------------------|
| <b>*First Name and Middle Initial(s)</b>                                                                                             | <b>*Last Name</b> | <b>*Suffix (eg, Jr, III)</b> | <b>Academic Degrees</b> | <b>Institution</b>                                               | <b>Location (city, state/province, country)</b> | <b>Role or Contribution, eg, chair, principal investigator</b> | <b>Group (if more than 1 Group listed in the byline and/or Subgroup (eg, Steering Committee))</b> |
| Stephanie                                                                                                                            | Anaya             |                              | MD                      | Mayo Clinic Alix School of Medicine                              | Rochester, Minnesota                            | Investigator                                                   |                                                                                                   |
| Jake                                                                                                                                 | Arbon             |                              | MD                      | University of Utah Health, Psychiatry                            | Salt Lake City, Utah                            | Investigator                                                   |                                                                                                   |
| Nicholas                                                                                                                             | Berry             |                              | MD                      | Hackensack Meridian Health Palisades Medical Center, Dermatology | Hackensack, New Jersey                          | Investigator                                                   |                                                                                                   |
| Adip                                                                                                                                 | Bhargav           |                              | MD                      | University of Kansas Medical Center, Neurosurgery                | Kansas City, Kansas                             | Investigator                                                   |                                                                                                   |
| Lauren                                                                                                                               | Breslin           |                              | MD                      | Mayo Clinic Alix School of Medicine                              | Rochester, Minnesota                            | Investigator                                                   |                                                                                                   |
| Gabriell                                                                                                                             | Cummings          |                              | MD                      | Mayo Clinic Alix School of Medicine                              | Rochester, Minnesota                            | Investigator                                                   |                                                                                                   |
| Sam                                                                                                                                  | Ekstein           |                              | MD                      | Mayo Clinic Alix School of Medicine                              | Rochester, Minnesota                            | Investigator                                                   |                                                                                                   |
| Cecilia                                                                                                                              | Fung              |                              | MD                      | Mayo Clinic Alix School of Medicine                              | Rochester, Minnesota                            | Investigator                                                   |                                                                                                   |
| Benjamin                                                                                                                             | Gorman            |                              | MD                      | Mayo Clinic Alix School of Medicine                              | Rochester, Minnesota                            | Investigator                                                   |                                                                                                   |
| Maya                                                                                                                                 | Harrington        |                              | MD                      | Mayo Clinic Alix School of Medicine                              | Rochester, Minnesota                            | Investigator                                                   |                                                                                                   |
| James                                                                                                                                | Hwang             |                              | MD                      | Mayo Clinic Alix School of Medicine                              | Rochester, Minnesota                            | Investigator                                                   |                                                                                                   |
| Tyler                                                                                                                                | Jarvis            |                              | MD                      | Penn State Hershey Medical Center, Plastic Surgery               | Hershey, Pennsylvania                           | Investigator                                                   |                                                                                                   |
| Monica                                                                                                                               | Kirollos          |                              | MD                      | Mayo Clinic Alix School of Medicine                              | Rochester, Minnesota                            | Investigator                                                   |                                                                                                   |
| Meg                                                                                                                                  | Lang              |                              | MD                      | Mayo Clinic Alix School of Medicine                              | Rochester, Minnesota                            | Investigator                                                   |                                                                                                   |
| Rachel                                                                                                                               | Lopdrup           |                              | MD                      | Aurora St. Lukes Medical Center, Family Medicine                 | Milwaukee, Wisconsin                            | Investigator                                                   |                                                                                                   |
| Sheila                                                                                                                               | Malekian          |                              | MD                      | University of California Irvine Medical Center, Family Medicine  | Irvine, California                              | Investigator                                                   |                                                                                                   |
| Parth Pradip                                                                                                                         | Patel             |                              | MD                      | University of Pennsylvania, Medicine                             | Philadelphia, Pennsylvania                      | Investigator                                                   |                                                                                                   |
| Jordan                                                                                                                               | Pollock           |                              | MD                      | Mayo Clinic Alix School of Medicine                              | Rochester, Minnesota                            | Investigator                                                   |                                                                                                   |
| Alex                                                                                                                                 | Roth              |                              | MD                      | Mayo Clinic College of Medicine and Science, Psychiatry          | Rochester, Minnesota                            | Investigator                                                   |                                                                                                   |
| Hiba                                                                                                                                 | Saifuddin         |                              | MD                      | LSU School of Medicine, Plastic Surgery                          | New Orleans LA                                  | Investigator                                                   |                                                                                                   |
| Serena                                                                                                                               | Shimshak          |                              | MD                      | Mayo Clinic Alix School of Medicine                              | Rochester, Minnesota                            | Investigator                                                   |                                                                                                   |
| Daniel                                                                                                                               | Sykora            |                              | MD                      | Mayo Clinic College of Medicine and Science, Medicine            | Rochester, Minnesota                            | Investigator                                                   |                                                                                                   |
| Caitlin                                                                                                                              | VanLith           |                              | MD                      | Mayo Clinic Alix School of Medicine                              | Rochester, Minnesota                            | Investigator                                                   |                                                                                                   |
| Samantha                                                                                                                             | Wilder            |                              | MD                      | Mayo Clinic Alix School of Medicine                              | Rochester, Minnesota                            | Investigator                                                   |                                                                                                   |
| Samuel                                                                                                                               | Wu                |                              | MD                      | Mayo Clinic Alix School of Medicine                              | Rochester, Minnesota                            | Investigator                                                   |                                                                                                   |
